# Supplementary material for: A humanized nanobody phage display library yields potent binders of SARS CoV-2 spike
Source: PubMed Central journal article supplement (PMC9365158; doi:10.1371/journal.pone.0272364), 2022-08-10

**Figure. S1A**

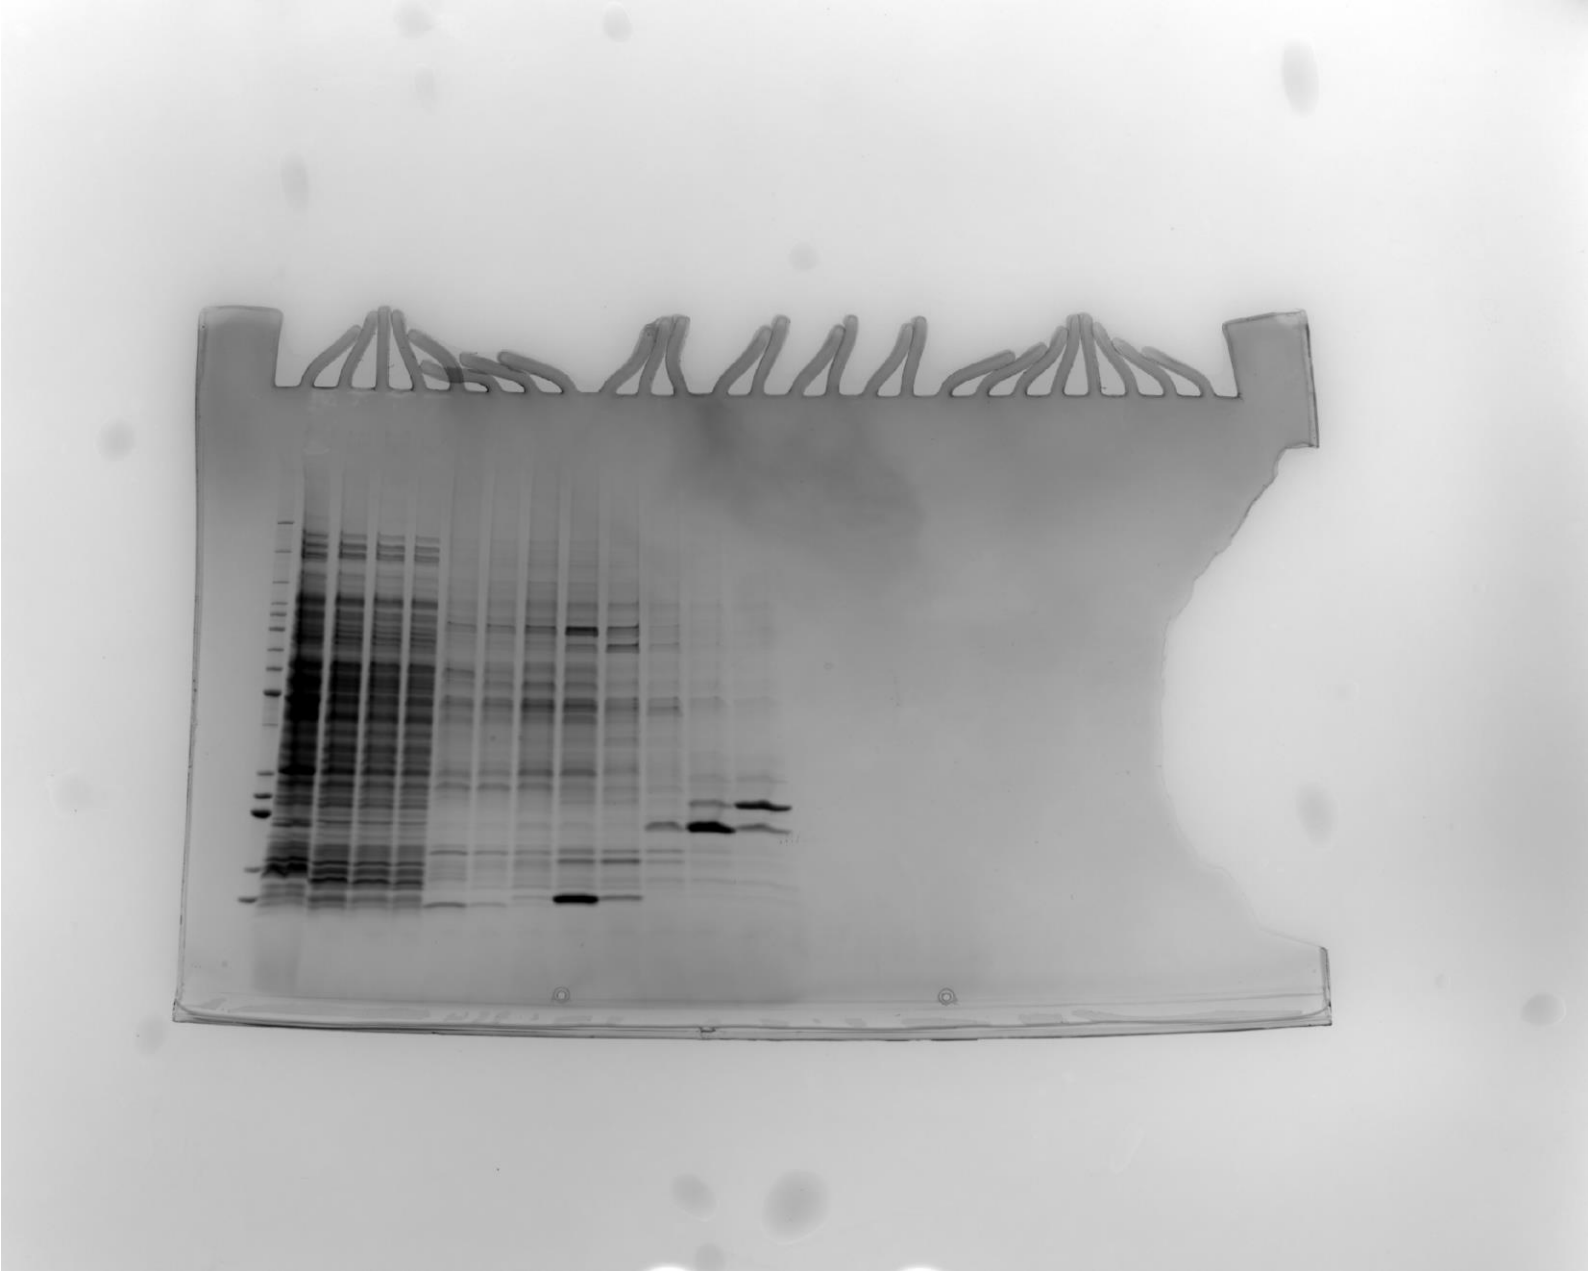

**Figure. S1B**

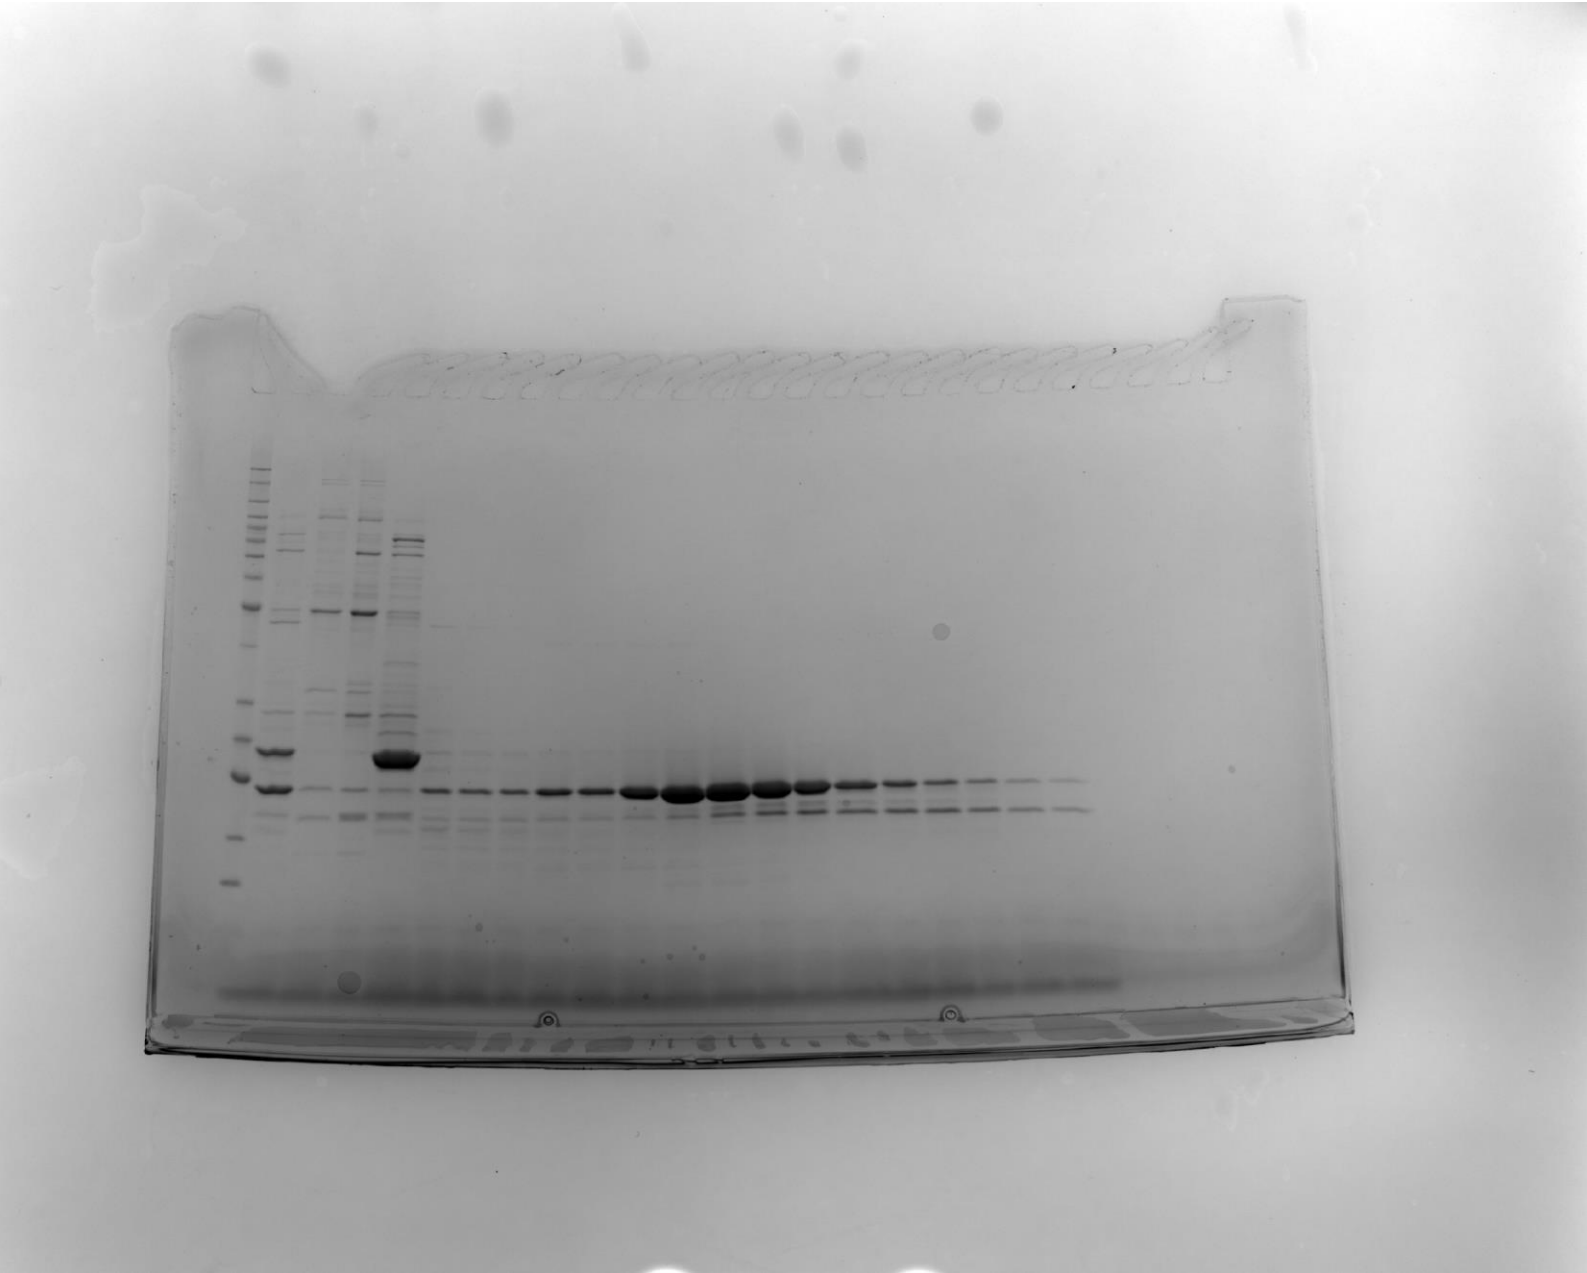

Figure. S1C

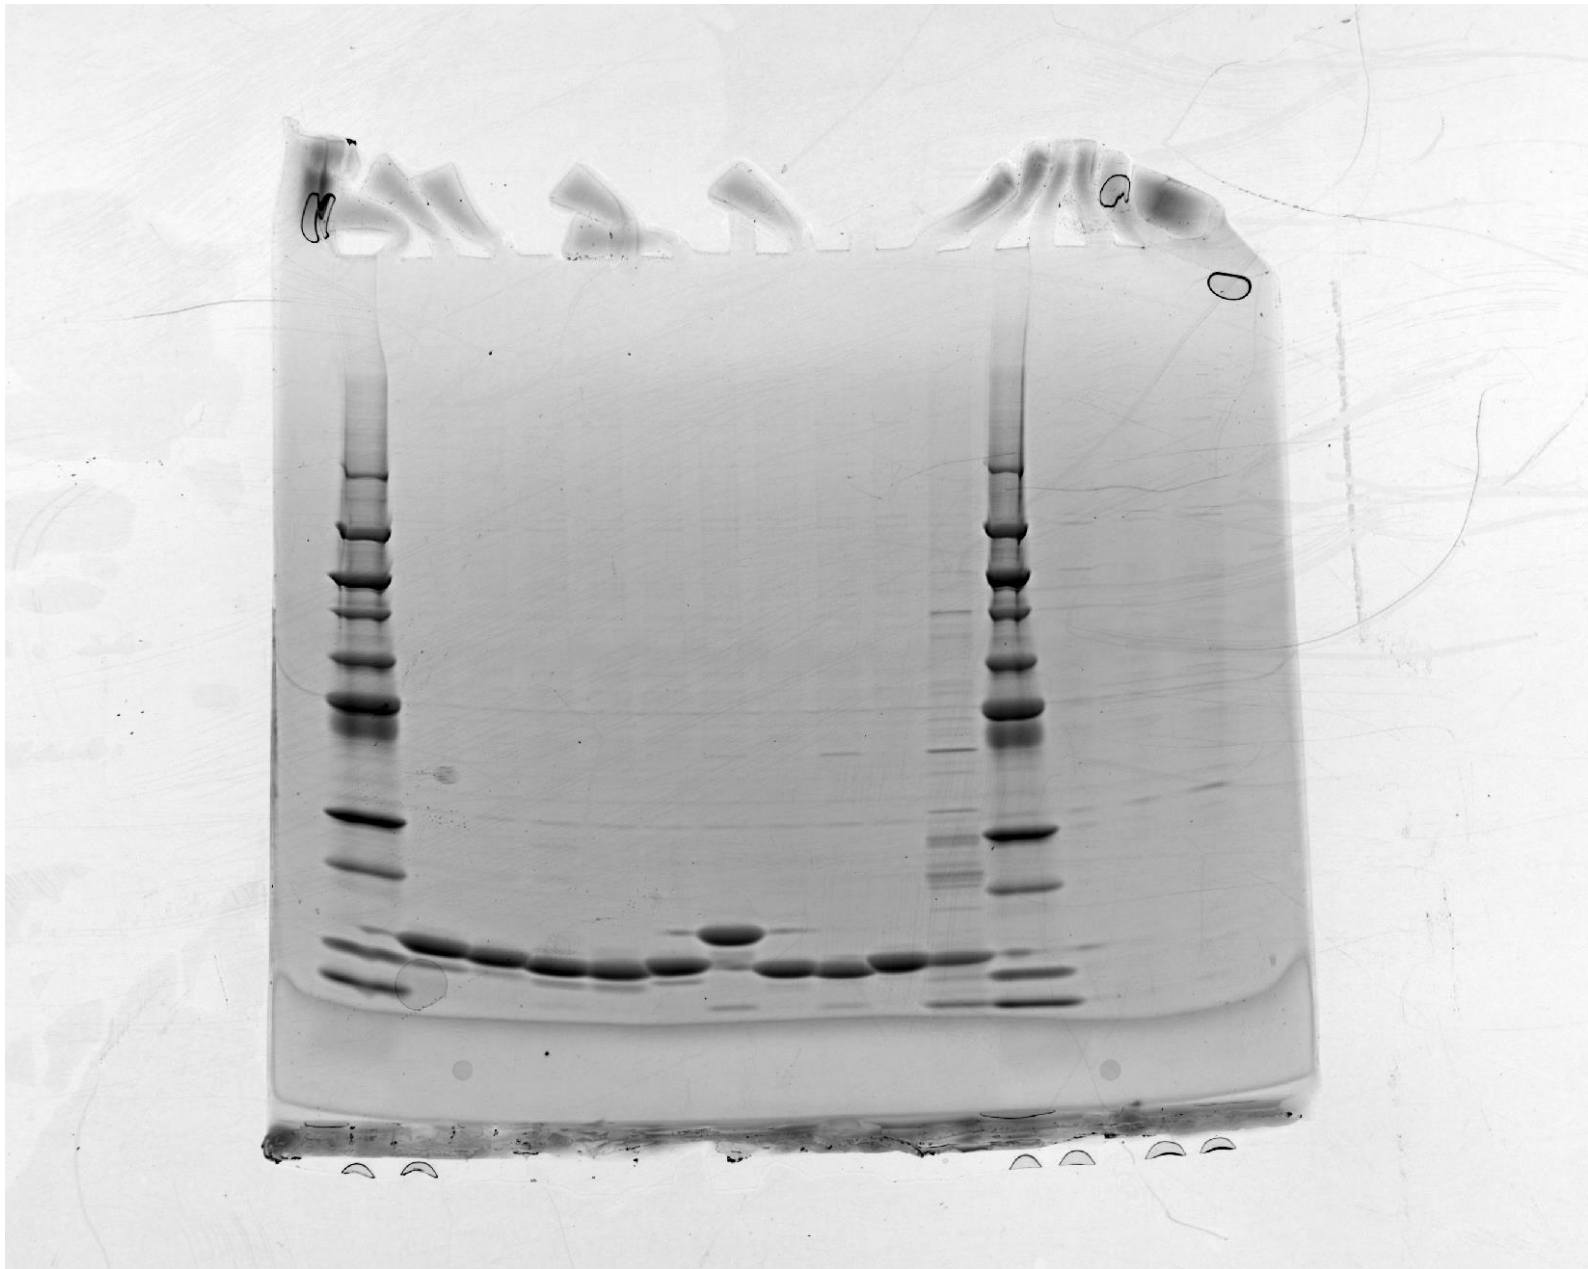

Supplement: pone.0272364.s023.pdf [file pone.0272364.s023.pdf]
